# Supplementary material
Source: ML conference proceedings conference paper supplement (https://openreview.net/forum?id=tDNr5rt47g)

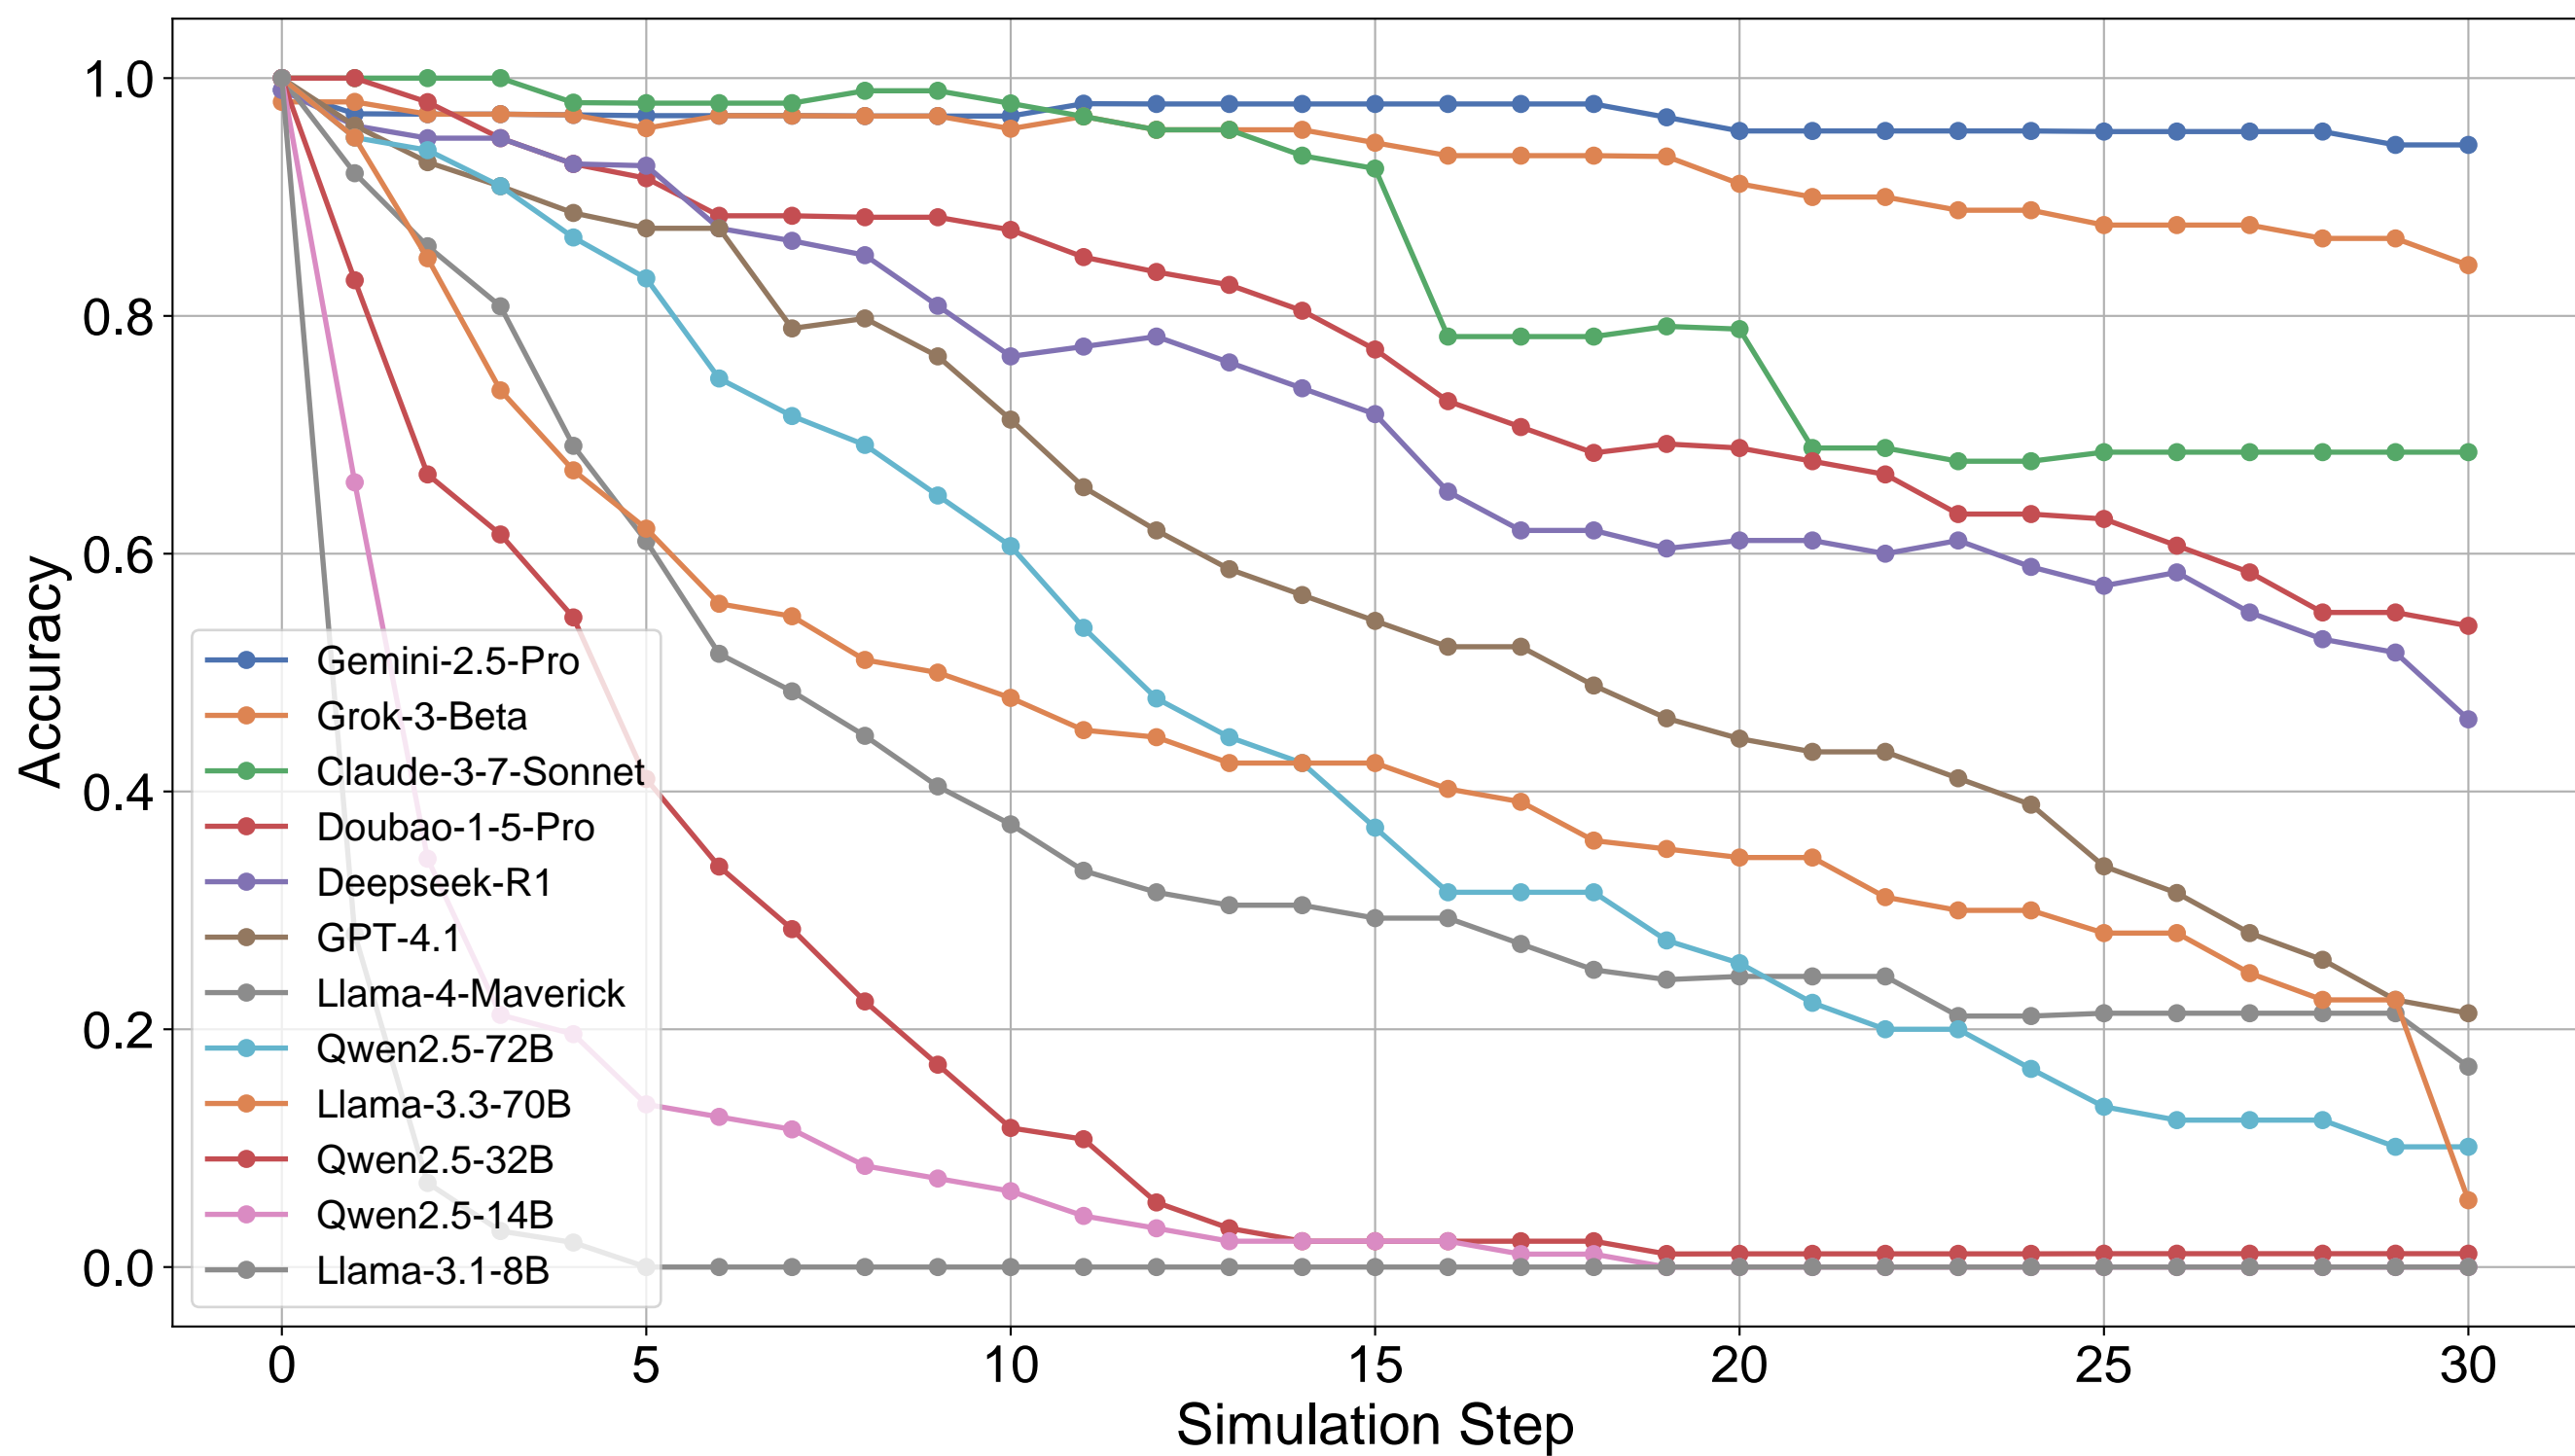

Supplement: supplementary_material [file TMBench.pdf › Turing-Machine-Bench/assets/TMBench.pdf]
